# Supplementary material for: Identifying molecular features that are associated with biological function of intrinsically disordered protein regions
Source: eLife journal article supplement (doi:10.7554/elife.60220), 2021-02-22
Supplement: supp [file heldout_idr_probability_cdc28_mito.xlsx]

## Sheet: Sheet1
idr_names	cdc28_goldstandard_hits	mitochondrion..GO.0005739.
YIL125W_idr_1	0.010423	0.674426
YNL311C_idr_1	0.0253239	0.229572
YER169W_idr_3	0.0122853	0.136632
YER169W_idr_5	0.0680726	0.113133
YPL112C_idr_1	0.0279427	0.123897
YLR314C_idr_1	0.00622247	0.102723
YGL207W_idr_7	0.0130533	0.149821
YGL207W_idr_8	0.0344701	0.348313
YPL240C_idr_2	0.0149261	0.160858
YPL240C_idr_6	0.0381828	0.236559
YKL160W_idr_2	0.00964902	0.0704494
YMR102C_idr_1	0.0118611	0.142937
YMR102C_idr_10	0.0210905	0.218145
YMR102C_idr_5	0.00906612	0.245782
YMR102C_idr_8	0.0196404	0.141404
YJR127C_idr_10	0.0197956	0.121932
YJR127C_idr_17	0.0108339	0.218483
YJR127C_idr_7	0.0300481	0.0632175
YJR127C_idr_8	0.0598807	0.13746
YLR113W_idr_2	0.00668591	0.12841
YDL035C_idr_4	0.0102187	0.117601
YDL035C_idr_6	0.0265344	0.12425
YDL035C_idr_7	0.0155354	0.17483
YDL035C_idr_9	0.0243409	0.131388
YNL077W_idr_2	0.00949744	0.095395
YNL077W_idr_3	0.0188575	0.115607
YPL014W_idr_1	0.0184046	0.144195
YPL014W_idr_2	0.0140996	0.194453
YPL014W_idr_4	0.016759	0.11709
YER123W_idr_5	0.0334929	0.181767
YLR187W_idr_1	0.0612563	0.231672
YLR187W_idr_2	0.100855	0.0406301
YPL060W_idr_1	0.0168831	0.463177
YGL247W_idr_1	0.0140945	0.252745
YDR175C_idr_1	0.017229	0.4741
YDR425W_idr_1	0.00861043	0.0336502
YDR425W_idr_6	0.022225	0.196126
YPL093W_idr_5	0.00967501	0.267547
YHR105W_idr_2	0.0166664	0.105373
YDL008W_idr_2	0.01278	0.0807548
YLR310C_idr_1	0.0191612	0.0934014
YLR310C_idr_12	0.0240488	0.104568
YLR310C_idr_13	0.0138116	0.256868
YLR310C_idr_15	0.0150991	0.289575
YLR310C_idr_18	0.0321809	0.108619
YLR310C_idr_20	0.0388225	0.101738
YLR310C_idr_21	0.0155816	0.159616
YLR310C_idr_22	0.0140438	0.237734
YLR310C_idr_3	0.0112923	0.196203
YLR310C_idr_8	0.00894497	0.162532
YIL157C_idr_1	0.0198931	0.560084
YNL172W_idr_12	0.0308873	0.170488
YNL172W_idr_13	0.0166266	0.192324
YNL172W_idr_15	0.0252814	0.209423
YNL172W_idr_16	0.0348105	0.215897
YNL172W_idr_2	0.0146008	0.214278
YNL172W_idr_5	0.0185812	0.164078
YCR071C_idr_1	0.0133772	0.511063
YBR199W_idr_2	0.014043	0.11986
YGL191W_idr_1	0.0187425	0.54507
YGL219C_idr_6	0.00989091	0.198351
YGL219C_idr_8	0.0191276	0.179865
YMR240C_idr_1	0.0146062	0.268447
YMR240C_idr_2	0.010703	0.127925
YMR240C_idr_4	0.00774872	0.117954
YPR097W_idr_19	0.0122705	0.123976
YPR097W_idr_5	0.0212323	0.050126
YNL230C_idr_1	0.0890712	0.285972
YGR249W_idr_1	0.0366557	0.118384
YGR249W_idr_4	0.0177214	0.138846
YJL070C_idr_1	0.00921	0.127919
YJL070C_idr_5	0.0119277	0.156553
YJL070C_idr_7	0.0117747	0.149578
YMR281W_idr_1	0.0240971	0.289003
YOL123W_idr_1	0.00456882	0.0925914
YOL123W_idr_10	0.0144584	0.208137
YOL123W_idr_3	0.0260615	0.129039
YOL123W_idr_5	0.00898306	0.215297
YML061C_idr_13	0.00866954	0.141486
YMR244W_idr_1	0.010393	0.212327
YMR244W_idr_4	0.0158801	0.215098
YER127W_idr_3	0.0142499	0.425416
YNL137C_idr_1	0.0145527	0.376178
YNL137C_idr_5	0.0198131	0.378817
YER028C_idr_10	0.0111485	0.134735
YER028C_idr_8	0.0428857	0.252695
YPL050C_idr_1	0.0107724	0.413615
YHR122W_idr_3	0.017771	0.149939
YJL106W_idr_3	0.0064779	0.097548
YCL057W_idr_1	0.00798009	0.464292
YFL002C_idr_4	0.0123562	0.171289
YDR495C_idr_1	0.0100722	0.0591239
YDR495C_idr_9	0.0203316	0.130077
YCR034W_idr_2	0.0733404	0.189396
YDR006C_idr_1	0.0243506	0.0901185
YDR006C_idr_10	0.0194318	0.107234
YDR006C_idr_3	0.0115252	0.19811
YDR006C_idr_5	0.012599	0.0984648
YJR090C_idr_2	0.0152317	0.255191
YJR090C_idr_3	0.00943085	0.233046
YJR090C_idr_4	0.0117632	0.0957862
YJR090C_idr_5	0.0319307	0.187866
YOR107W_idr_3	0.0152196	0.108223
YOR107W_idr_4	0.0166631	0.214855
YGL153W_idr_3	0.0122549	0.165443
YDR295C_idr_3	0.0219942	0.117236
YOR116C_idr_13	0.0137794	0.341642
YBR037C_idr_1	0.0219327	0.383704
YDR208W_idr_1	0.0119337	0.128819
YDR208W_idr_5	0.00838355	0.116724
YKR028W_idr_3	0.0121375	0.0969096
YKR028W_idr_5	0.0126437	0.0932139
YKR028W_idr_8	0.00922894	0.174025
YKR028W_idr_9	0.0133326	0.0395335
YER017C_idr_1	0.00939146	0.371613
YML052W_idr_3	0.00735144	0.116989
YBR150C_idr_1	0.0285469	0.150081
YBR150C_idr_2	0.0209956	0.133353
YBR150C_idr_7	0.0224679	0.117424
YBL051C_idr_1	0.017155	0.127148
YBL051C_idr_2	0.00707277	0.226773
YBL051C_idr_4	0.0330021	0.146059
YBL051C_idr_8	0.010208	0.136766
YKL005C_idr_1	0.0173755	0.232093
YKL005C_idr_2	0.0117406	0.400808
YKL005C_idr_5	0.012415	0.126342
YGR246C_idr_5	0.0126182	0.095575
YGR246C_idr_6	0.0175322	0.204854
YJL083W_idr_2	0.0109301	0.261005
YJL083W_idr_3	0.0323879	0.214834
YJL083W_idr_8	0.022119	0.088144
YJL083W_idr_9	0.0156476	0.162427
YGR149W_idr_4	0.0138882	0.130864
YML123C_idr_5	0.0121429	0.155515
YKR016W_idr_1	0.00955588	0.571379
YKR016W_idr_2	0.00758601	0.300469
YHR023W_idr_13	0.00559366	0.373909
YHR023W_idr_14	0.0113858	0.251433
YHR023W_idr_15	0.0415145	0.249532
YNL016W_idr_1	0.0173884	0.134619
YNL016W_idr_4	0.0103677	0.121255
YOR371C_idr_5	0.0184896	0.130526
YOR371C_idr_7	0.0244554	0.140388
YOR371C_idr_8	0.0230584	0.173733
YDL129W_idr_6	0.0408962	0.253838
YOL075C_idr_7	0.0146723	0.162014
YOL075C_idr_9	0.0219231	0.152834
YHL020C_idr_3	0.00546106	0.0811078
YHL020C_idr_6	0.0175137	0.083737
YHL020C_idr_7	0.017362	0.0869368
YNR015W_idr_1	0.00733253	0.241769
YEL031W_idr_11	0.0088087	0.281942
YEL031W_idr_2	0.0126828	0.25319
YDR462W_idr_1	0.014181	0.335113
YEL053C_idr_2	0.0188138	0.225574
YPL199C_idr_2	0.0153761	0.11747
YLR049C_idr_2	0.0144398	0.145744
YOL034W_idr_1	0.0136844	0.137133
YOR154W_idr_2	0.0145902	0.152662
YOR154W_idr_4	0.0155214	0.20792
YOR154W_idr_5	0.010451	0.15952
YJR021C_idr_3	0.0181853	0.14782
YFR006W_idr_1	0.0117473	0.212194
YCR065W_idr_1	0.0650581	0.258341
YCR065W_idr_2	0.232519	0.0487382
YER080W_idr_1	0.0157574	0.770052
YGR217W_idr_1	0.0476232	0.0832809
YGR217W_idr_4	0.0109336	0.321742
YGR217W_idr_9	0.190969	0.129032
YDR314C_idr_1	0.0153415	0.150007
YOR372C_idr_2	0.0498476	0.168818
YOR372C_idr_6	0.0223714	0.227075
YOR372C_idr_7	0.0210708	0.203714
YPR067W_idr_1	0.0344874	0.589956
YMR015C_idr_1	0.009678	0.197654
YHR108W_idr_2	0.125864	0.241481
YHR108W_idr_5	0.0190085	0.0878111
YDR072C_idr_3	0.0151727	0.113191
YCR008W_idr_1	0.0196778	0.256233
YGL227W_idr_11	0.0172975	0.142428
YGL227W_idr_14	0.0151254	0.15294
YGL227W_idr_15	0.0129081	0.0853721
YGL227W_idr_3	0.0132858	0.317043
YGL227W_idr_9	0.0148504	0.0563667
YDL056W_idr_2	0.0194469	0.133557
YDR273W_idr_1	0.00876461	0.073883
YOL009C_idr_2	0.0154379	0.102154
YLR002C_idr_1	0.0203917	0.155954
YLR002C_idr_2	0.0221103	0.111132
YLR002C_idr_3	0.0147558	0.24595
YBL009W_idr_2	0.050563	0.157594
YGR113W_idr_1	0.0186262	0.213161
YGR113W_idr_2	0.0126212	0.07804
YGR113W_idr_9	0.00818492	0.405788
YDR289C_idr_7	0.0161911	0.116447
YGR255C_idr_2	0.0122347	0.190685
YHR042W_idr_1	0.0126645	0.231593
YKL176C_idr_4	0.0127962	0.124673
YKL176C_idr_5	0.0493521	0.217722
YDR043C_idr_2	0.027291	0.165611
YPR095C_idr_1	0.00664881	0.187753
YPR095C_idr_13	0.0765127	0.238637
YPR095C_idr_14	0.0538405	0.115659
YPR095C_idr_15	0.0193235	0.201983
YPR095C_idr_7	0.0239457	0.0991915
YDR409W_idr_2	0.0153121	0.264421
YDR409W_idr_4	0.0349263	0.0785517
YDR263C_idr_2	0.0103837	0.136661
YMR239C_idr_1	0.00375001	0.14189
YNL310C_idr_1	0.00979764	0.717586
YDR527W_idr_1	0.007292	0.292941
YDR527W_idr_4	0.00875115	0.104422
YMR136W_idr_3	0.0273872	0.10815
YMR136W_idr_4	0.0156145	0.197306
YDR077W_idr_1	0.000946233	0.0595757
YKL140W_idr_2	0.0461725	0.150933
YKL140W_idr_5	0.0114925	0.141207
YDR089W_idr_1	0.0203343	0.151472
YDR089W_idr_10	0.0471258	0.236173
YDR089W_idr_3	0.0162642	0.225846
YPL123C_idr_1	0.00814505	0.243187
YIL078W_idr_1	0.0164762	0.309935
YIL121W_idr_1	0.0087954	0.127846
YBR059C_idr_2	0.0205217	0.10085
YOR322C_idr_10	0.0563116	0.197822
YOR322C_idr_11	0.0228572	0.125344
YOR322C_idr_4	0.0261475	0.121142
YOR322C_idr_7	0.0180069	0.132783
YDR088C_idr_6	0.00872327	0.130347
YDR088C_idr_7	0.00974658	0.261228
YDR499W_idr_4	0.0211544	0.201834
YGR081C_idr_1	0.00899417	0.343781
YGR081C_idr_3	0.0104667	0.220164
YCL010C_idr_2	0.0137736	0.116748
YDR480W_idr_9	0.0148854	0.0699498
YBR028C_idr_1	0.0116951	0.164225
YBR028C_idr_2	0.0360025	0.150312
YGL014W_idr_1	0.0286686	0.10901
YDL175C_idr_1	0.0119367	0.160705
YDL175C_idr_5	0.0101382	0.0792868
YGL103W_idr_1	0.0136239	0.231265
YDR179W-A_idr_1	0.0188123	0.160617
YNR049C_idr_2	0.0113304	0.365657
YBL019W_idr_5	0.00864466	0.222899
YLR442C_idr_3	0.0766297	0.0301131
YDR124W_idr_7	0.0158152	0.154402
YML015C_idr_3	0.00821667	0.157801
YML015C_idr_4	0.0160348	0.181264
YIL093C_idr_5	0.00993317	0.122661
YBR112C_idr_2	0.00625255	0.104533
YNL110C_idr_1	0.00674066	0.107705
YEL015W_idr_3	0.00682875	0.0997593
YEL015W_idr_5	0.0181406	0.0577633
YLR380W_idr_2	0.010923	0.134522
YML064C_idr_3	0.0291673	0.199486
YOR368W_idr_4	0.0110182	0.102971
YGL114W_idr_2	0.0115294	0.252639
YGL114W_idr_3	0.020849	0.166024
YNL071W_idr_2	0.00339586	0.221819
YOR204W_idr_1	0.013917	0.281229
YOR204W_idr_3	0.0138044	0.27115
YLR373C_idr_1	0.00742488	0.0649101
YLR373C_idr_11	0.0162703	0.0883793
YML013W_idr_2	0.0302725	0.345209
YML013W_idr_8	0.020965	0.232406
YLR228C_idr_1	0.0201972	0.143543
YLR228C_idr_2	0.0354601	0.11397
YPL020C_idr_10	0.0299264	0.329005
YPL020C_idr_12	0.0217335	0.270117
YPL020C_idr_5	0.0450012	0.250711
YDR379W_idr_2	0.799762	0.138329
YDR379W_idr_5	0.0486179	0.144366
YOR129C_idr_11	0.0200064	0.0759666
YOR129C_idr_3	0.0396221	0.231912
YOR129C_idr_5	0.186535	0.204799
YMR287C_idr_1	0.0202092	0.34864
YJR110W_idr_3	0.0141177	0.0893981
YJR110W_idr_7	0.0129046	0.195313
YBR290W_idr_2	0.0154755	0.198136
YJR056C_idr_2	0.0149854	0.193603
YJR056C_idr_6	0.0213017	0.204969
YGL031C_idr_2	0.00591478	0.552037
YOL087C_idr_10	0.021359	0.156315
YOL087C_idr_4	0.0663172	0.179128
YOL087C_idr_7	0.0251876	0.0627219
YJL109C_idr_27	0.0102178	0.250609
YJL109C_idr_30	0.0115327	0.221824
YJL109C_idr_5	0.0142779	0.280312
YPR032W_idr_1	0.0157908	0.186115
YPR032W_idr_6	0.0212698	0.189887
YPR032W_idr_7	0.0102824	0.228447
YJR106W_idr_4	0.0165132	0.132864
YJR106W_idr_6	0.0350357	0.189274
YJL093C_idr_6	0.0176765	0.0804954
YDL179W_idr_2	0.0645671	0.170376
YOR153W_idr_1	0.0124923	0.152934
YOR153W_idr_7	0.0123003	0.259613
YOR153W_idr_8	0.00780468	0.175749
YOR032C_idr_4	0.0181498	0.0792684
YOR032C_idr_6	0.0119685	0.114759
YJL198W_idr_1	0.00817318	0.203392
YJL198W_idr_2	0.0217161	0.220821
YJL198W_idr_5	0.0087263	0.120372
YDR297W_idr_3	0.0117965	0.235626
YPR112C_idr_3	0.0110355	0.117246
YPR112C_idr_5	0.0099867	0.163579
YPR112C_idr_7	0.0108573	0.245514
YPR112C_idr_9	0.00874291	0.33849
YCR073C_idr_1	0.940985	0.170701
YCR073C_idr_6	0.00917953	0.152656
YCR073C_idr_7	0.0201127	0.197972
YKL043W_idr_3	0.0117601	0.121865
YKL043W_idr_4	0.00392481	0.0946185
YKR024C_idr_1	0.0066805	0.206273
YKR024C_idr_6	0.0154681	0.210517
YKR024C_idr_7	0.00752879	0.30755
YIL110W_idr_1	0.0183964	0.154089
YDL140C_idr_21	0.0589858	0.0800616
YJL165C_idr_1	0.0530755	0.128811
YJL165C_idr_2	0.0105487	0.100474
YPR189W_idr_2	0.017688	0.0684766
YGR110W_idr_1	0.0194478	0.37904
YJR005W_idr_5	0.0213711	0.265381
YPL221W_idr_4	0.040527	0.106132
YJL095W_idr_1	0.0613842	0.190627
YJL095W_idr_2	0.196534	0.243714
YJL095W_idr_4	0.0563462	0.180189
YJL095W_idr_7	0.0234527	0.272798
YDR475C_idr_3	0.0537151	0.296748
YDR475C_idr_4	0.0212554	0.182716
YDR475C_idr_8	0.0138568	0.125703
YDR475C_idr_9	0.00965894	0.0778054
YKL114C_idr_2	0.00950745	0.248747
YLR032W_idr_1	0.00938898	0.159663
YLR032W_idr_10	0.0378165	0.10926
YLR032W_idr_13	0.0248657	0.167337
YLR032W_idr_2	0.0127391	0.150814
YLR032W_idr_3	0.0146008	0.245417
YLR032W_idr_7	0.0805667	0.14635
YNR052C_idr_4	0.00988381	0.149474
YNR052C_idr_5	0.00890577	0.157121
YKL121W_idr_1	0.0113125	0.148991
YKL121W_idr_9	0.0187545	0.199444
YGR145W_idr_5	0.0178194	0.172292
YGR145W_idr_7	0.00953416	0.144501
YLR450W_idr_2	0.0119292	0.171609
YLR450W_idr_5	0.0127213	0.102983
YLR450W_idr_7	0.00951656	0.243696
YIL126W_idr_1	0.0100026	0.159386
YIL126W_idr_4	0.0144803	0.223771
YIL126W_idr_5	0.0138781	0.156384
YIL126W_idr_7	0.0432058	0.0838679
YPL022W_idr_1	0.0119087	0.149979
YPL022W_idr_5	0.00671104	0.162133
YPL022W_idr_6	0.00792631	0.300201
YDR387C_idr_1	0.0198919	0.188607
YKL203C_idr_1	0.0104421	0.152284
YKL203C_idr_22	0.00997421	0.335648
YKL203C_idr_31	0.0181375	0.267529
YKL203C_idr_32	0.031484	0.209827
YKL203C_idr_9	0.0115969	0.183701
YGR220C_idr_1	0.00927112	0.496959
YNL229C_idr_1	0.00932468	0.207661
YIL113W_idr_1	0.0382457	0.162681
YPR135W_idr_5	0.0132166	0.101229
YPR135W_idr_9	0.0150666	0.0763268
YNL308C_idr_1	0.0122366	0.0938396
YNL308C_idr_10	0.0103351	0.141817
YNL308C_idr_4	0.0168587	0.188101
YNL308C_idr_7	0.0101917	0.112684
YKL143W_idr_3	0.0179528	0.166906
YKL143W_idr_4	0.0113942	0.088534
YKL143W_idr_5	0.00848452	0.0904877
YKL143W_idr_7	0.0121573	0.18568
YGL208W_idr_1	0.0188036	0.0713283
YGL208W_idr_2	0.00758545	0.111591
YML110C_idr_1	0.0135974	0.324953
YLR048W_idr_2	0.00792076	0.200767
YOR355W_idr_3	0.0388776	0.173188
YOR355W_idr_5	0.0149227	0.16842
YOR355W_idr_7	0.021958	0.0914707
YOR217W_idr_1	0.0112233	0.151932
YOR217W_idr_6	0.00413105	0.295637
YOR217W_idr_9	0.00604674	0.236581
YMR199W_idr_6	0.0285812	0.13872
YKL113C_idr_1	0.0116083	0.282263
YKR031C_idr_10	0.00406291	0.204736
YKR031C_idr_11	0.0143393	0.0906696
YKR031C_idr_12	0.0135171	0.0928664
YKR031C_idr_14	0.0119038	0.139738
YKR031C_idr_15	0.0239734	0.123057
YKR031C_idr_6	0.013366	0.107449
YKR031C_idr_8	0.0266549	0.290144
YKR031C_idr_9	0.0143474	0.126573
YLR342W_idr_1	0.0531858	0.126878
YLR342W_idr_5	0.0150896	0.163685
YNL049C_idr_1	0.00979255	0.0929748
YFL034C-B_idr_1	0.266812	0.0901253
YDR137W_idr_5	0.00940902	0.162537
YDR137W_idr_9	0.0185392	0.128888
YIL104C_idr_4	0.0147735	0.141706
YIR010W_idr_1	0.0504866	0.26299
YIR010W_idr_4	0.0367113	0.198766
YIR010W_idr_5	0.0176846	0.138129
YIR010W_idr_7	0.018132	0.159996
YHR097C_idr_1	0.0150683	0.119027
YHR097C_idr_4	0.0100642	0.140837
YKL089W_idr_4	0.0452977	0.0864451
YKL089W_idr_5	0.00623851	0.126832
YPL132W_idr_2	0.0109463	0.481795
YPL132W_idr_3	0.0173342	0.133982
YNL288W_idr_1	0.00842422	0.0700738
YML057W_idr_1	0.0110678	0.240565
YML057W_idr_11	0.0549077	0.170455
YML057W_idr_6	0.0116449	0.249401
YML100W_idr_2	0.0126984	0.0954467
YML100W_idr_4	0.0654693	0.141284
YDL120W_idr_1	0.00824489	0.590723
YJL105W_idr_1	0.0136553	0.144094
YJL105W_idr_4	0.0125293	0.100691
YPR119W_idr_1	0.0166553	0.142588
YDL014W_idr_1	0.0114054	0.298035
YDR306C_idr_3	0.0303407	0.0683041
YOR006C_idr_1	0.0128676	0.245802
YOR006C_idr_2	0.00852146	0.0172015
YKL092C_idr_3	0.0262104	0.139132
YKL092C_idr_9	0.0425498	0.303218
YHR075C_idr_1	0.0114942	0.238267
YDR406W_idr_1	0.0180229	0.124602
YDR406W_idr_10	0.0144579	0.23081
YDR406W_idr_9	0.0106896	0.203045
YKR096W_idr_1	0.0532146	0.0464306
YKR096W_idr_14	0.0150659	0.185308
YKR096W_idr_3	0.0172946	0.147726
YKR096W_idr_6	0.0115048	0.129186
YGR103W_idr_5	0.0096799	0.154856
YGR103W_idr_6	0.0069365	0.177248
YPL074W_idr_6	0.00621388	0.323015
YPL074W_idr_7	0.0238235	0.319328
YBL035C_idr_2	0.154465	0.314506
YIR002C_idr_1	0.0232948	0.180774
YIR002C_idr_4	0.012552	0.242702
YIR002C_idr_6	0.0373592	0.12594
YIR002C_idr_7	0.0127443	0.146829
YER048C_idr_2	0.00606846	0.126243
YDR448W_idr_4	0.0166306	0.238808
YLR035C_idr_1	0.0160869	0.159503
YHR102W_idr_2	0.0354461	0.0637729
YHR102W_idr_3	0.00933367	0.105291
YOR195W_idr_16	0.0991559	0.0899453
YOR290C_idr_10	0.00963251	0.208893
YOR290C_idr_12	0.0327362	0.0841072
YOR290C_idr_14	0.0078935	0.139585
YOR290C_idr_15	0.0205933	0.127605
YOR290C_idr_22	0.0119808	0.250184
YOR290C_idr_4	0.00961499	0.174517
YOR290C_idr_8	0.0118803	0.203662
YLR059C_idr_1	0.00923021	0.584092
YFR034C_idr_3	0.115055	0.124141
YOR301W_idr_2	0.0168639	0.134851
YGL050W_idr_5	0.00785415	0.299014
YOR067C_idr_1	0.0101339	0.177305
YGR197C_idr_1	0.00833169	0.105386
YCL061C_idr_10	0.00831014	0.103839
YCL061C_idr_12	0.00879795	0.0872302
YCL061C_idr_3	0.0158929	0.138141
YCL061C_idr_4	0.0118517	0.117467
YCL061C_idr_9	0.036721	0.0990293
YGR180C_idr_2	0.00776495	0.192752
YMR164C_idr_1	0.0105246	0.101928
YMR164C_idr_15	0.034434	0.126046
YMR164C_idr_16	0.0105887	0.0527729
YPL141C_idr_1	0.0140122	0.217911
YPL141C_idr_2	0.0114186	0.222662
YPL141C_idr_4	0.269071	0.210509
YML042W_idr_1	0.0141132	0.372625
YDR517W_idr_8	0.0103643	0.12419
YIR001C_idr_1	0.0144739	0.114616
YPL147W_idr_6	0.0152014	0.177414
YOR058C_idr_1	0.035687	0.16592
YOR058C_idr_11	0.658051	0.334982
YIL066C_idr_1	0.0159875	0.225488
YOR036W_idr_2	0.0178797	0.121957
YBR073W_idr_2	0.00917688	0.151799
YBR073W_idr_7	0.0233223	0.225452
YBR073W_idr_8	0.0131937	0.190474
YBR073W_idr_9	0.0188911	0.277272
YOR310C_idr_1	0.00747257	0.177588
YDR153C_idr_3	0.0127492	0.0552646
YOL073C_idr_4	0.0100799	0.0620373
YBR041W_idr_1	0.0141937	0.399349
YBR197C_idr_3	0.0128623	0.164003
YHR098C_idr_1	0.065874	0.154896
YGL203C_idr_2	0.0146143	0.0130644
YGL203C_idr_5	0.012627	0.0783631
YHL030W_idr_10	0.0272917	0.221241
YHL030W_idr_21	0.0150043	0.114576
YHL030W_idr_22	0.0121005	0.236476
YAL022C_idr_1	0.0196018	0.107789
YJL207C_idr_10	0.00789851	0.140329
YJL207C_idr_25	0.0188558	0.269704
YJL207C_idr_7	0.0112773	0.234377
YJL207C_idr_9	0.0116299	0.315256
YAL051W_idr_1	0.0300798	0.16274
YAL051W_idr_10	0.0190487	0.165576
YAL051W_idr_7	0.0230073	0.157139
YMR213W_idr_10	0.0123216	0.167868
YMR213W_idr_11	0.00900978	0.119668
YMR213W_idr_6	0.0128151	0.230677
YMR213W_idr_7	0.0137109	0.331876
YOR079C_idr_2	0.011278	0.337866
YGR055W_idr_1	0.041374	0.173551
YHR027C_idr_1	0.00778914	0.174546
YHR027C_idr_5	0.0105861	0.076886
YOR267C_idr_1	0.0156972	0.172382
YOR267C_idr_2	0.0383637	0.0968176
YML006C_idr_10	0.0138114	0.0754534
YML006C_idr_3	0.018866	0.116834
YML006C_idr_6	0.00963524	0.110725
YOL041C_idr_1	0.00463868	0.0929661
YOL041C_idr_3	0.015678	0.342441
YDL007W_idr_1	0.011494	0.242832
YOR352W_idr_5	0.0213754	0.0614871
YLR300W_idr_1	0.0106137	0.280422
YLR356W_idr_2	0.00941136	0.13906
YJR134C_idr_6	0.0178908	0.132058
YJR134C_idr_8	0.0557724	0.113895
YIL013C_idr_6	0.0126534	0.15685
YPR156C_idr_1	0.0144095	0.113852
YCR042C_idr_18	0.0110852	0.0451293
YCR042C_idr_20	0.0117501	0.211506
YCR042C_idr_7	0.0138343	0.142212
YCR042C_idr_9	0.0120816	0.346858
YER022W_idr_10	0.0116674	0.087939
YER022W_idr_8	0.0178854	0.0683526
YMR073C_idr_1	0.02171	0.33729
YMR073C_idr_2	0.0130427	0.24666
YKL163W_idr_2	0.00564188	0.180863
YKL163W_idr_4	0.00539471	0.160217
YBR142W_idr_12	0.0158758	0.171111
YBR142W_idr_6	0.0110852	0.0478386
YDR346C_idr_2	0.00886978	0.0697547
YOR030W_idr_4	0.0194578	0.216748
YOR030W_idr_7	0.0168388	0.162669
YKR013W_idr_3	0.0255238	0.113774
YPR003C_idr_1	0.029502	0.181151
YBL081W_idr_2	0.0192131	0.161998
YBL081W_idr_3	0.0288773	0.0887727
YBL081W_idr_4	0.0186602	0.0548943
YOR008C_idr_2	0.00779473	0.0616633
YMR042W_idr_1	0.0230873	0.0522332
YEL001C_idr_1	0.00762969	0.15192
YNL053W_idr_1	0.0311307	0.220822
YNL053W_idr_2	0.0731079	0.119706
YGL021W_idr_6	0.0178251	0.170455
YBL011W_idr_2	0.00840206	0.178741
YBL011W_idr_3	0.0152456	0.167094
YDL142C_idr_1	0.0178583	0.479015
YJL134W_idr_1	0.00826226	0.176694
YGR116W_idr_1	0.0195832	0.128191
YGR116W_idr_10	0.0129189	0.149038
YGR116W_idr_5	0.0115518	0.252427
YGR116W_idr_7	0.0136385	0.148862
YGR116W_idr_9	0.0100189	0.0673456
YKR089C_idr_2	0.0195779	0.172687
YKR089C_idr_5	0.0847828	0.255255
YKR089C_idr_9	0.0233475	0.136607
YML081W_idr_13	0.0164719	0.167912
YML081W_idr_2	0.0127094	0.0873087
YML081W_idr_4	0.0201247	0.079227
YML081W_idr_6	0.0609507	0.154498
YMR183C_idr_1	0.0102429	0.137387
YMR183C_idr_2	0.0110546	0.405831
YAL039C_idr_1	0.0225171	0.185458
YML071C_idr_4	0.0128768	0.0568587
YMR088C_idr_1	0.00984904	0.158621
YPL116W_idr_5	0.0736338	0.41391
YPL116W_idr_7	0.0275874	0.114195
YDR054C_idr_2	0.0126806	0.0671766
YIL161W_idr_1	0.0120448	0.178469
YKR048C_idr_1	0.0254625	0.161284
YKR048C_idr_6	0.0102108	0.0511365
YOR140W_idr_1	0.00707463	0.0984852
YOR140W_idr_2	0.0129706	0.13802
YOR140W_idr_3	0.0208963	0.148111
YDR463W_idr_10	0.0175974	0.0918038
YDR463W_idr_5	0.0132882	0.112348
YNL321W_idr_1	0.03707	0.239375
YNL321W_idr_2	0.0287508	0.0727727
YNL321W_idr_4	0.0138726	0.082641
YGR162W_idr_1	0.00239834	0.0767465
YGR162W_idr_6	0.00947838	0.24735
YER008C_idr_1	0.047254	0.291358
YER008C_idr_14	0.0128456	0.271
YER008C_idr_8	0.0884134	0.0570737
YOL091W_idr_1	0.0102207	0.104975
YBL032W_idr_1	0.0130211	0.106021
YBL032W_idr_2	0.00916003	0.13239
YBL032W_idr_3	0.0109417	0.113569
YPR171W_idr_2	0.0193342	0.170837
YPR171W_idr_4	0.129142	0.126614
YPL159C_idr_2	0.0106218	0.14908
YOL018C_idr_1	0.0158216	0.125098
YOR119C_idr_3	0.0140643	0.240992
YOR119C_idr_4	0.0129867	0.133009
YNL094W_idr_3	0.00946952	0.127672
YNL094W_idr_5	0.0225592	0.17217
YBR136W_idr_25	0.0188917	0.260227
YJR060W_idr_3	0.00422902	0.0276713
YLR055C_idr_1	0.0105438	0.0227329
YKR034W_idr_2	0.0194157	0.161749
YFR048W_idr_3	0.0107809	0.303395
YFR048W_idr_6	0.0106566	0.231664
YNL323W_idr_2	0.0143593	0.135159
YGR218W_idr_4	0.01288	0.207873
YDR239C_idr_1	0.0837429	0.0720138
YDR239C_idr_3	0.0294325	0.11663
YDR239C_idr_9	0.0262347	0.172406
YOR017W_idr_10	0.0100661	0.297378
YDR266C_idr_1	0.0273149	0.156568
YDR266C_idr_2	0.0166094	0.269553
YDR266C_idr_4	0.0159612	0.174177
YPL164C_idr_2	0.0216337	0.336857
YPL164C_idr_5	0.0388982	0.205039
YPR023C_idr_4	0.0110345	0.137204
YLR309C_idr_17	0.0161932	0.214076
YLR309C_idr_21	0.00552476	0.197526
YLR309C_idr_3	0.00815269	0.158863
YBR274W_idr_4	0.0240217	0.200927
YGL229C_idr_11	0.00966041	0.0773755
YGL229C_idr_3	0.0185497	0.13247
YGL229C_idr_6	0.00733293	0.0880358
YGL229C_idr_8	0.0216701	0.0742207
YFL049W_idr_5	0.015298	0.133141
YIL079C_idr_1	0.0110572	0.186007
YIL079C_idr_4	0.01468	0.0716874
YGL197W_idr_4	0.0326231	0.164206
YGL197W_idr_6	0.0321382	0.120744
YGL197W_idr_9	0.030953	0.0738483
YGL228W_idr_2	0.00855101	0.0675278
YGL228W_idr_4	0.00769095	0.0971617
YIL135C_idr_2	0.0127033	0.235011
YIL135C_idr_5	0.0193527	0.283436
YIL135C_idr_6	0.0351819	0.0676369
YIL135C_idr_8	0.0191703	0.253501
YER059W_idr_1	0.0434093	0.100158
YMR198W_idr_1	0.031296	0.191577
YBL097W_idr_10	0.0138677	0.145659
YBL097W_idr_15	0.0203892	0.135166
YBL097W_idr_8	0.00999203	0.108668
YBL097W_idr_9	0.00662871	0.119861
YOL001W_idr_4	0.052819	0.14956
YBR086C_idr_8	0.00850628	0.241839
YJR143C_idr_1	0.0145896	0.368704
YGR074W_idr_2	0.0109403	0.384857
YMR275C_idr_1	0.0513417	0.317879
YMR275C_idr_2	0.011743	0.15747
YMR275C_idr_4	0.0138863	0.170291
YMR275C_idr_5	0.0102387	0.189084
YOR066W_idr_11	0.0313846	0.126682
YOR066W_idr_2	0.0138235	0.24125
YOR066W_idr_5	0.652459	0.201534
YOR066W_idr_8	0.0429498	0.199658
YOR066W_idr_9	0.049488	0.140737
YDR338C_idr_4	0.0270825	0.0684315
YLL032C_idr_8	0.0302704	0.142884
YLR110C_idr_2	0.00759542	0.231017
YML120C_idr_1	0.00569361	0.305961
YMR266W_idr_1	0.0160056	0.251617
YMR266W_idr_2	0.0192759	0.236854
YOR198C_idr_6	0.00982657	0.184587
YOR198C_idr_8	0.00985311	0.157086
YER069W_idr_1	0.0120826	0.393283
YER069W_idr_2	0.0206878	0.233751
YDR062W_idr_1	0.00991033	0.284351
YBR105C_idr_1	0.037969	0.216112
YOR162C_idr_1	0.0213432	0.150115
YOR162C_idr_3	0.0120281	0.107395
YOR162C_idr_9	0.0200013	0.200459
YPR160W_idr_1	0.00970343	0.148046
YLR392C_idr_6	0.0122684	0.152496
YMR224C_idr_5	0.018334	0.0753134
YMR155W_idr_4	0.0549627	0.175046
YKR077W_idr_1	0.813023	0.236841
YKR077W_idr_3	0.0683207	0.139659
YHL016C_idr_3	0.0130678	0.180621
YHL016C_idr_4	0.0121131	0.21143
YNL218W_idr_2	0.0107417	0.145698
YCR091W_idr_1	0.399997	0.0860975
YPL216W_idr_14	0.0111647	0.155569
YPL216W_idr_2	0.0197283	0.224811
YPL216W_idr_4	0.0262706	0.211238
YPL216W_idr_5	0.00709958	0.0733615
YPL216W_idr_8	0.0157033	0.156998
YPL216W_idr_9	0.012044	0.0848679
YOL145C_idr_3	0.00884864	0.0517689
YBR133C_idr_12	0.0144587	0.0808717
YJR002W_idr_3	0.00468496	0.0249641
YJR002W_idr_7	0.0115529	0.317768
YIL115C_idr_10	0.0313254	0.0229241
YIL115C_idr_5	0.00851782	0.282228
YLR072W_idr_1	0.206958	0.0943225
YLR072W_idr_2	0.00972447	0.0607693
YLR072W_idr_3	0.0131596	0.188732
YGR134W_idr_7	0.0143351	0.0793225
YJL112W_idr_1	0.0116252	0.169872
YJL194W_idr_1	0.273277	0.252133
YNL306W_idr_2	0.0194911	0.366844
YER011W_idr_3	0.00270069	0.176645
YGL162W_idr_4	0.0335441	0.124835
YER087C-B_idr_1	0.00951088	0.276129
YIL063C_idr_1	0.0109286	0.0818069
YOL068C_idr_3	0.0156766	0.122547
YOR011W_idr_8	0.0139881	0.131632
YHR197W_idr_6	0.0120916	0.235624
YHR197W_idr_7	0.00625884	0.0805309
YDL053C_idr_2	0.0170452	0.214871
YDR176W_idr_1	0.0166051	0.183991
YDR176W_idr_2	0.00692412	0.0738303
YDR176W_idr_3	0.0140261	0.241186
YDR176W_idr_4	0.0269837	0.125484
YDR375C_idr_1	0.0200096	0.156401
YHR092C_idr_1	0.0255714	0.148484
YGR100W_idr_5	0.0130479	0.366635
YGR100W_idr_7	0.0169128	0.16612
YGR100W_idr_8	0.0105984	0.186291
YGR100W_idr_9	0.012741	0.143577
YMR263W_idr_1	0.0119945	0.212811
YKL148C_idr_1	0.00902866	0.459236
YDR394W_idr_1	0.0185854	0.188877
YNL273W_idr_10	0.0165584	0.235485
YNL273W_idr_11	0.00842571	0.168087
YNL273W_idr_3	0.00903079	0.0848815
YNL273W_idr_4	0.0144014	0.0803027
YNL273W_idr_7	0.00811866	0.216076
YPR185W_idr_10	0.0250359	0.218474
YJL209W_idr_1	0.0121878	0.400205
YJL059W_idr_2	0.0087899	0.148613
YGL090W_idr_2	0.0745374	0.149005
YGL090W_idr_5	0.0127342	0.0735959
YML076C_idr_1	0.0202062	0.152881
YML076C_idr_4	0.0247287	0.141283
YML076C_idr_6	0.0359704	0.148435
YLR256W_idr_1	0.0169098	0.0723771
YLR256W_idr_10	0.0603915	0.135837
YLR256W_idr_15	0.0212906	0.236424
YLR256W_idr_17	0.0133391	0.197936
YLR256W_idr_5	0.0142727	0.207884
YLR256W_idr_6	0.0152478	0.117458
YLR256W_idr_8	0.0175062	0.46979
YDR398W_idr_2	0.00932849	0.117564
YOR059C_idr_2	0.0117541	0.124899
YNL088W_idr_15	0.00665559	0.100878
YNL088W_idr_16	0.00962787	0.0430059
YLR150W_idr_10	0.0131923	0.238825
YLR150W_idr_5	0.0105017	0.294154
YLL029W_idr_1	0.0156342	0.191687
YNL167C_idr_1	0.0603619	0.0912413
YNL167C_idr_4	0.0137542	0.105553
YJL092W_idr_10	0.0467465	0.100163
YJL092W_idr_11	0.0102666	0.25959
YJL092W_idr_2	0.292288	0.244344
YJL092W_idr_4	0.0125965	0.209699
YMR190C_idr_3	0.0209688	0.0732686
YMR190C_idr_5	0.0212039	0.242114
YMR190C_idr_6	0.0342848	0.184112
YGL129C_idr_1	0.0115629	0.48975
YLR436C_idr_10	0.0365066	0.0990969
YLR436C_idr_19	0.0228681	0.149505
YLR436C_idr_2	0.0130529	0.238114
YLR436C_idr_3	0.0173615	0.0700702
YEL041W_idr_1	0.00918498	0.142596
YEL041W_idr_6	0.00775782	0.082173
YOR161C_idr_1	0.00829083	0.119258
YFL034W_idr_1	0.00986762	0.115998
YFL034W_idr_11	0.0102639	0.150318
YFL034W_idr_3	0.0141421	0.212776
YFL034W_idr_6	0.022841	0.0768616
YFL034W_idr_9	0.00786463	0.0891762
YBR169C_idr_4	0.00260851	0.258169
YGR271C-A_idr_2	0.0114468	0.110714
YNL102W_idr_5	0.145193	0.152584
YPL176C_idr_1	0.0073447	0.148923
YKL214C_idr_2	0.0154049	0.223983
YKL214C_idr_3	0.0132351	0.263018
YLR005W_idr_1	0.0106663	0.0884284
YBL020W_idr_1	0.0124409	0.197166
YOL070C_idr_1	0.141453	0.191999
YOL070C_idr_2	0.0584306	0.0977746
YOR043W_idr_1	0.0196752	0.135862
YOR043W_idr_2	0.0176419	0.159474
YOR043W_idr_4	0.0274865	0.176811
YOR043W_idr_6	0.0101649	0.18824
YKL172W_idr_2	0.00761025	0.0499522
YKL172W_idr_4	0.020785	0.177172
YNL093W_idr_2	0.0183044	0.221971
YGR211W_idr_1	0.0111306	0.164748
YGR211W_idr_2	0.00874118	0.202374
YMR167W_idr_2	0.0259636	0.128778
YNL251C_idr_2	0.0141713	0.131091
YNL251C_idr_3	0.0298817	0.144159
YNL251C_idr_4	0.0111937	0.12345
YDR037W_idr_1	0.015916	0.235164
YDR037W_idr_2	0.00967849	0.225163
YNL253W_idr_2	0.00884552	0.203412
YAL056W_idr_11	0.0162693	0.105977
YPR175W_idr_11	0.0115902	0.175242
YPR175W_idr_6	0.0185487	0.0744194
YCR037C_idr_1	0.019713	0.168658
YCR037C_idr_2	0.0125298	0.0671658
YCR037C_idr_3	0.0112771	0.191501
YLR144C_idr_1	0.0153284	0.0958693
YDR443C_idr_10	0.013691	0.179112
YDR443C_idr_12	0.0277547	0.265376
YDR443C_idr_9	0.161528	0.0787044
YDL234C_idr_6	0.00985272	0.180746
YDL234C_idr_7	0.0101381	0.0875608
YDL234C_idr_8	0.00721658	0.251566
YPL140C_idr_1	0.037442	0.311868
YDL153C_idr_1	0.00783963	0.138023
YDL153C_idr_10	0.0180129	0.0874606
YDL153C_idr_14	0.0136042	0.153063
YDL153C_idr_15	0.0195098	0.101344
YDL153C_idr_16	0.00923692	0.205253
YDL153C_idr_2	0.0181285	0.315953
YDL153C_idr_3	0.0128172	0.195651
YLL002W_idr_5	0.0175381	0.396392
YLR276C_idr_2	0.0148131	0.0725125
YLR276C_idr_4	0.0116681	0.283552
YMR233W_idr_3	0.00928433	0.216076
YIL112W_idr_1	0.00912365	0.200792
YLR422W_idr_16	0.0130334	0.0974471
YLR422W_idr_30	0.0119208	0.292417
YLR422W_idr_32	0.0123154	0.181026
YLR422W_idr_4	0.0249903	0.20843
YDR283C_idr_13	0.0144112	0.185203
YDR283C_idr_16	0.0279936	0.226827
YDR283C_idr_21	0.0218988	0.0487857
YLR183C_idr_1	0.0932037	0.144715
YLR183C_idr_2	0.216351	0.193577
YLR183C_idr_4	0.620108	0.0861616
YLR186W_idr_1	0.0272899	0.250984
YPL129W_idr_2	0.0100837	0.252746
YNL062C_idr_3	0.0105809	0.208939
YAL044C_idr_1	0.0101851	0.510465
YER158C_idr_1	0.0250466	0.17504
YER158C_idr_10	0.0426571	0.118953
YER158C_idr_2	0.0178116	0.127789
YNL142W_idr_2	0.0123238	0.252245
YDR243C_idr_1	0.00849042	0.174235
YDL214C_idr_1	0.0261246	0.0680746
YDL214C_idr_3	0.0216159	0.178867
YGL027C_idr_1	0.013869	0.23501
YLR136C_idr_3	0.0195426	0.134408
YFL004W_idr_5	0.020148	0.190365
YFL004W_idr_7	0.012356	0.155145
YPL195W_idr_4	0.0101847	0.0604143
YGR237C_idr_11	0.0154428	0.263282
YGR237C_idr_2	0.0140669	0.184923
YGR237C_idr_3	0.0208633	0.111967
YGR237C_idr_4	0.0277575	0.233148
YGR237C_idr_5	0.0266921	0.211703
YGR237C_idr_6	0.0252824	0.124864
YGR237C_idr_7	0.0299196	0.293462
YML104C_idr_1	0.0101784	0.375704
YML104C_idr_18	0.0233138	0.164796
YML104C_idr_3	0.0141874	0.148917
YML104C_idr_5	0.0114375	0.0947081
YML104C_idr_9	0.0130279	0.152357
YNL289W_idr_4	0.0428507	0.211535
YCL034W_idr_3	0.0105868	0.167912
YCL034W_idr_4	0.00858705	0.0710937
YHR051W_idr_1	0.0187192	0.605791
YDR412W_idr_3	0.0104646	0.0816737
YDR412W_idr_5	0.0127437	0.141788
YOR042W_idr_1	0.007113	0.10071
YOR042W_idr_3	0.0116496	0.23006
YOR042W_idr_4	0.0130102	0.155279
YOR042W_idr_5	0.0425864	0.116411
YNL115C_idr_1	0.0120461	0.132952
YMR039C_idr_1	0.00858454	0.172196
YMR039C_idr_4	0.00661885	0.0916581
YNL304W_idr_1	0.0462722	0.227084
YNL304W_idr_2	0.028162	0.308185
YNL304W_idr_3	0.0200727	0.101877
YOR007C_idr_2	0.0125804	0.199758
YOR244W_idr_2	0.0526436	0.146325
YMR145C_idr_1	0.00762701	0.574374
YDR501W_idr_1	0.0313591	0.139146
YDR501W_idr_2	0.593364	0.20673
YDR501W_idr_4	0.664836	0.0576113
YDR081C_idr_13	0.0124392	0.0855334
YDR081C_idr_15	0.0143558	0.113866
YDR081C_idr_4	0.0286159	0.0757982
YDR081C_idr_7	0.0120596	0.191348
YDL036C_idr_1	0.0136428	0.390207
YDR046C_idr_1	0.0154914	0.207431
YIL023C_idr_1	0.0070923	0.207113
YML117W_idr_10	0.0202912	0.0759416
YML117W_idr_4	0.0087638	0.0908007
YML117W_idr_7	0.103847	0.22009
YNL265C_idr_2	0.0113143	0.1442
YMR247C_idr_1	0.0134269	0.176774
YJL168C_idr_2	0.0143507	0.204566
YJL168C_idr_5	0.00920496	0.14968
YBR284W_idr_1	0.0110915	0.1531
YBR284W_idr_5	0.0181992	0.140076
YBR172C_idr_1	0.093076	0.0647842
YBR172C_idr_4	0.00406605	0.276803
YBR172C_idr_5	0.0127292	0.189508
YEL063C_idr_1	0.0288936	0.142633
YPL226W_idr_2	0.0162137	0.184245
YPL226W_idr_5	0.11189	0.14835
YOR124C_idr_1	0.011471	0.110159
YOR124C_idr_11	0.0264601	0.140856
YOR124C_idr_13	0.0122688	0.253724
YPL223C_idr_2	0.0176133	0.133143
YGR108W_idr_1	0.00904775	0.141371
YFR001W_idr_1	0.00965419	0.31287
YFR001W_idr_3	0.0102402	0.30814
YDR097C_idr_1	0.209129	0.0303644
YDR097C_idr_4	0.0188932	0.269585
YOR115C_idr_1	0.0144082	0.135623
YOR115C_idr_2	0.0124559	0.124917
YKR019C_idr_4	0.0154396	0.270049
YKR019C_idr_6	0.0310267	0.0468036
YKR019C_idr_9	0.0122898	0.315888
YLR130C_idr_4	0.0253689	0.0937875
YEL043W_idr_3	0.0145142	0.0918858
YEL043W_idr_6	0.0106222	0.212523
YEL043W_idr_7	0.0830392	0.0635005
YJL096W_idr_1	0.0157477	0.521935
YOL136C_idr_1	0.0132387	0.124318
YHL009C_idr_3	0.0178933	0.144907
YMR029C_idr_4	0.0081613	0.121613
YLR152C_idr_2	0.0151357	0.113157
YLR152C_idr_3	0.0101769	0.139465
YJL201W_idr_3	0.119339	0.243066
YGR090W_idr_1	0.0144408	0.0519783
YLR127C_idr_4	0.0125758	0.187433
YPR002W_idr_1	0.00990149	0.358329
YGR099W_idr_2	0.0110743	0.118603
YGR099W_idr_3	0.012307	0.311614
YCL033C_idr_1	0.0106825	0.451757
YMR124W_idr_3	0.0451077	0.0956333
YAL026C_idr_1	0.0132356	0.189555
YAL026C_idr_5	0.0121411	0.375888
YNR019W_idr_2	0.0173137	0.108669
YNR019W_idr_5	0.012132	0.217653
YDR152W_idr_5	0.0146338	0.126073
YBR068C_idr_1	0.0112074	0.146883
YBR200W_idr_1	0.0363531	0.309416
YBR200W_idr_3	0.00787928	0.120157
YBR200W_idr_5	0.0232383	0.246684
YDL110C_idr_3	0.00945796	0.151663
YHR170W_idr_6	0.00474054	0.172823
YBR212W_idr_1	0.0136711	0.134134
YBR212W_idr_15	0.00974328	0.116834
YBR212W_idr_8	0.0108605	0.112056
YGR098C_idr_1	0.0644203	0.19975
YGR098C_idr_4	0.116882	0.262741
YGR098C_idr_8	0.0132316	0.210739
YNR039C_idr_1	0.227753	0.142194
YLR443W_idr_2	0.0191191	0.150837
YHR118C_idr_3	0.997801	0.089512
YKL068W_idr_1	0.00518523	0.129291
YKR100C_idr_5	0.00923875	0.113806
YDR490C_idr_1	0.0105363	0.106076
YDR490C_idr_10	0.0255116	0.206276
YDR490C_idr_8	0.0189315	0.186607
YDR001C_idr_1	0.0301902	0.121854
YBL061C_idr_2	0.0231956	0.125648
YDR119W_idr_2	0.00909584	0.162314
YIR011C_idr_1	0.0110028	0.13046
YGL140C_idr_3	0.017113	0.224643
YGL140C_idr_5	0.0233975	0.151109
YGL140C_idr_6	0.00923528	0.114804
YGL140C_idr_9	0.0293641	0.163671
YFL016C_idr_1	0.0213664	0.446509
YFL016C_idr_3	0.00715965	0.0833787
YFL016C_idr_4	0.0150927	0.196297
YNL176C_idr_1	0.00909548	0.0341159
YNL176C_idr_4	0.0135626	0.21335
YPL070W_idr_1	0.0801623	0.19267
YPL070W_idr_5	0.0137254	0.205307
YPL070W_idr_7	0.0175334	0.256428
YPL070W_idr_8	0.0524858	0.0953058
YBR014C_idr_4	0.00494858	0.196928
YER161C_idr_1	0.0201942	0.326954
YER161C_idr_2	0.014439	0.133196
YHR196W_idr_4	0.0164494	0.109554
YHR196W_idr_6	0.0126563	0.167255
YPL004C_idr_1	0.0194311	0.256913
YPL004C_idr_2	0.0166164	0.0619779
YDL070W_idr_1	0.00844827	0.114674
YDL070W_idr_2	0.00454503	0.162733
YDL070W_idr_4	0.0211235	0.151698
YNL004W_idr_1	0.0243314	0.167455
YNL004W_idr_3	0.00944537	0.129683
YGR152C_idr_1	0.0204512	0.179224
YNL293W_idr_1	0.0342098	0.074274
YNL293W_idr_7	0.0189629	0.213095
YER122C_idr_2	0.00911471	0.0642118
YOL004W_idr_1	0.013098	0.0830287
YOL004W_idr_14	0.0112185	0.183057
YOL004W_idr_7	0.00921021	0.170459
YOL004W_idr_8	0.0428701	0.118873
YOL004W_idr_9	0.00789202	0.0731798
YBR054W_idr_4	0.0149888	0.16157
YPR026W_idr_1	0.0183953	0.151773
YKR099W_idr_3	0.0535621	0.0954988
YKR099W_idr_4	0.047898	0.12794
YKR099W_idr_5	0.0165131	0.158396
YLL003W_idr_1	0.00704749	0.186281
YLL003W_idr_2	0.295602	0.179137
YLL003W_idr_7	0.0633159	0.198404
