# Supplementary figures and images for: Identifying molecular features that are associated with biological function of intrinsically disordered protein regions
Source: eLife journal article supplement (doi:10.7554/elife.60220), 2021-02-22

A

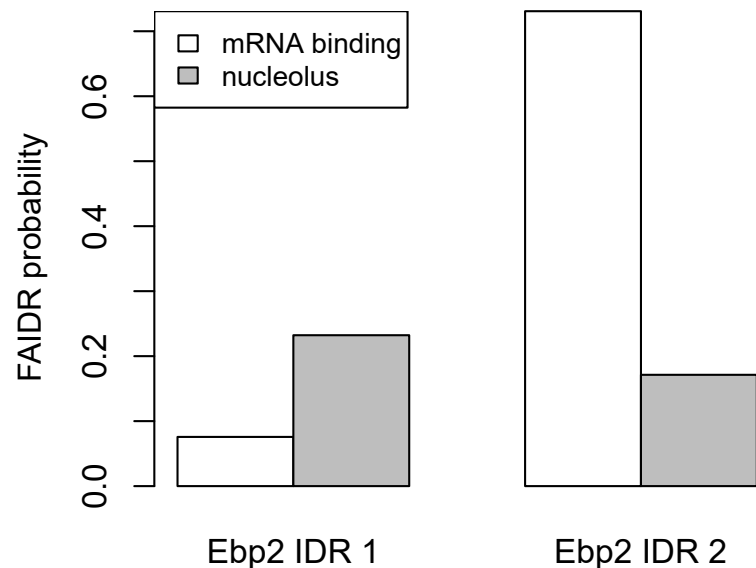

B

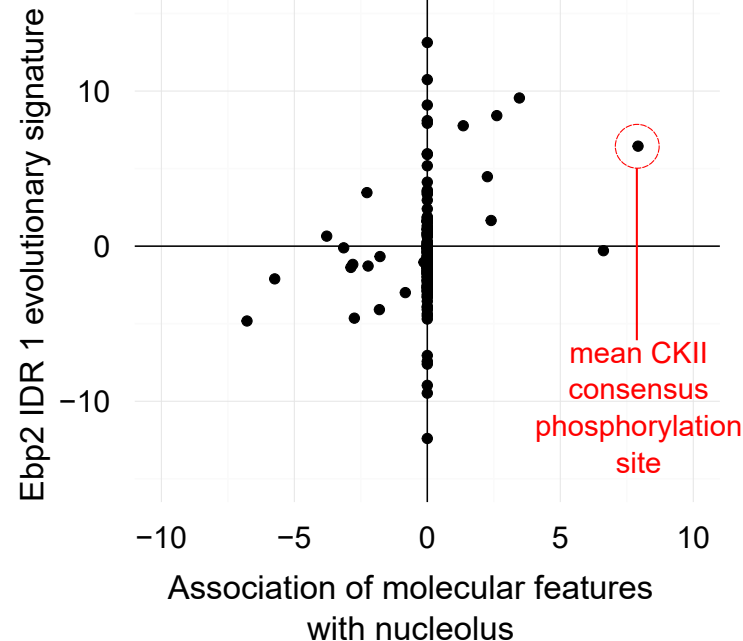

C

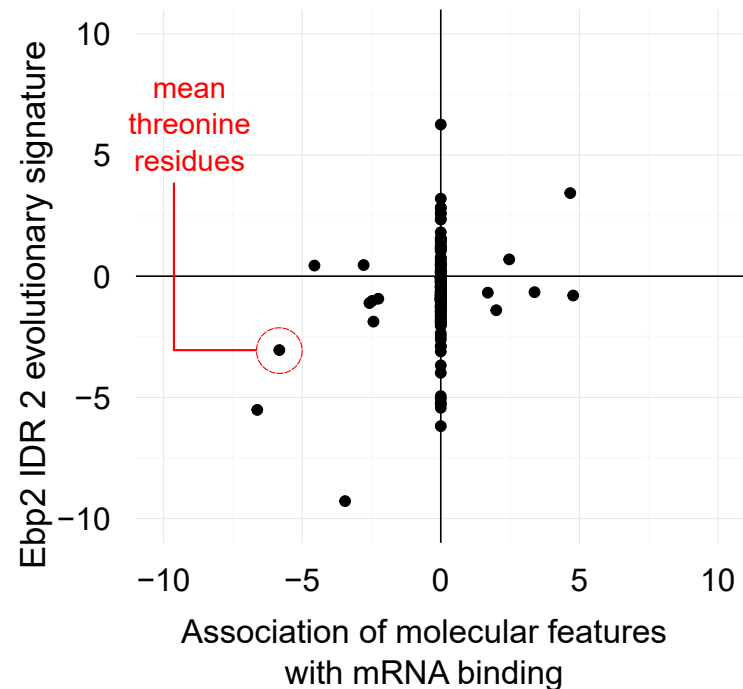

D

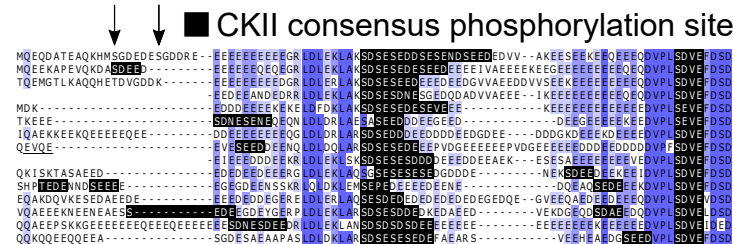

Ebp2 IDR 1

E

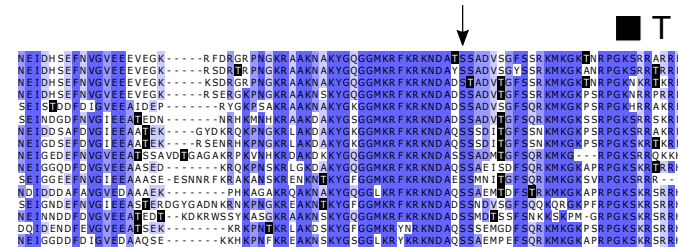

Ebp2 IDR 2

Supplement: supp [file elife_poa_e60220_Figure_5_figure_supplement_1.pdf › elife_poa_e60220_Figure_5_figure_supplement_1.pdf]
